# Supplementary material for: Post-depositional vivianite formation alters sediment phosphorus records
Source: Copernicus journal article supplement (doi:10.5194/bg-2017-295), 2017-08-31
Supplement: Supplementary file 1 [file bg-2017-295-supplement.pdf]

## Supplementary information

**Table S1: Elemental concentrations of precipitate 1 and 4 in mol% as estimated by SEM-EDS. The locations of the spot analysis (1-3 for precipitate 1 and 1-5 for precipitate 4) are indicated in Fig. 10.**

|      | Precipitate 1 |       |       |       | Precipitate 4 |       |       |       |       |       |
|------|---------------|-------|-------|-------|---------------|-------|-------|-------|-------|-------|
|      | 1             | 2     | 3     | MEAN  | 1             | 2     | 3     | 4     | 5     | MEAN  |
| Na   | 1.35          | 2.29  | 4.64  | 2.76  | 14.33         | 2.73  | 3.37  | 0.66  | 0.00  | 4.22  |
| Mg   | 4.52          | 5.05  | 4.80  | 4.79  | 8.82          | 39.29 | 9.77  | 12.00 | 7.04  | 15.38 |
| P    | 46.00         | 42.67 | 38.39 | 42.35 | 38.57         | 47.56 | 39.30 | 42.84 | 25.57 | 38.77 |
| S    | 1.68          | 1.97  | 4.18  | 2.61  | 9.64          | 2.44  | 2.67  | 1.13  | 18.97 | 6.97  |
| Cl   | 0.32          | 0.95  | 0.46  | 0.58  | 1.10          | 0.38  | 0.47  | 0.13  | 0.00  | 0.42  |
| Mn   | 0.00          | 0.00  | 0.00  | 0.00  | 13.50         | 2.63  | 18.26 | 13.20 | 23.85 | 14.29 |
| Fe   | 46.13         | 47.08 | 47.52 | 46.91 | 14.05         | 4.98  | 26.16 | 30.04 | 24.57 | 19.96 |
| Fe/P | 1.00          | 1.10  | 1.24  | 1.11  | 0.36          | 0.10  | 0.67  | 0.70  | 0.96  | 0.51  |
| Mn/P | 0.00          | 0.00  | 0.00  | 0.00  | 0.35          | 0.06  | 0.46  | 0.31  | 0.93  | 0.37  |
| Mg/P | 0.10          | 0.12  | 0.13  | 0.11  | 0.23          | 0.83  | 0.25  | 0.28  | 0.28  | 0.40  |

**Table S2. Additional governing equations**

| <b>Property</b>                                          | <b>Governing equation</b>                          |
|----------------------------------------------------------|----------------------------------------------------|
| Tortuosity                                               | $\theta^2 = 1 - 2\ln(\phi)$                        |
| Molecular diffusion coefficient corrected for tortuosity | $D' = \frac{D_m}{\theta^2}$                        |
| Advective velocity at depth                              | $v_\infty = \frac{F_{sed}}{\rho(1 - \phi_\infty)}$ |

**Table S3. Environmental parameters used by the diagenetic model.**

| <b>Parameter</b>                                                              | <b>Symbol</b>                | <b>Value</b> | <b>Units</b>                      |
|-------------------------------------------------------------------------------|------------------------------|--------------|-----------------------------------|
| Porosity at surface                                                           | $\phi_0$                     | 0.880        | -                                 |
| Porosity at depth                                                             | $\phi_\infty$                | 0.704        | -                                 |
| Porosity e-folding distance                                                   | $\gamma$                     | 2506         | cm                                |
| Sediment density                                                              | $\rho$                       | 2.65         | $\text{g cm}^{-3}$                |
| Temperature                                                                   | T                            | 9            | $^{\circ}\text{C}$                |
| Sediment accumulation rate                                                    | $F_{\text{sed}}$             | 0.1809       | $\text{g cm}^{-2} \text{yr}^{-1}$ |
| C:N ratio of OM                                                               | C/N                          | 106/16       | -                                 |
| C:P ratio of OM <sup><math>\alpha,\beta</math></sup>                          | C/P                          | 106/1        | -                                 |
| C:P ratio of OM <sup><math>\gamma</math></sup>                                | C/P                          | 250/1        | -                                 |
| P:Fe ratio of Fe(OH) <sub>3</sub> <sup><math>\alpha,\beta,\gamma</math></sup> | $\chi^{\alpha,\beta,\gamma}$ | 0.02         | -                                 |

Table S4. Boundary conditions at the sediment-water interface.

| Time-independent boundary conditions            |            |                                      |
|-------------------------------------------------|------------|--------------------------------------|
| Parameter                                       | Value      | Unit                                 |
| $J_{FeCO_3}$                                    | 0          | mol m <sup>-2</sup> yr <sup>-1</sup> |
| $J_{S_0}$                                       | 0          | mol m <sup>-2</sup> yr <sup>-1</sup> |
| $J_{CaP}$                                       | 0.003926   | mol m <sup>-2</sup> yr <sup>-1</sup> |
| $J_{Fe_3(PO_4)_2}$                              | 0          | mol m <sup>-2</sup> yr <sup>-1</sup> |
| $J_{FeS}$                                       | 0          | mol m <sup>-2</sup> yr <sup>-1</sup> |
| [ $Fe^{2+}$ ]                                   | 0          | μmol L <sup>-1</sup>                 |
| [ $CH_4$ ]                                      | 0.1        | μmol L <sup>-1</sup>                 |
| [ $\Sigma NH_4^+$ ]                             | 100        | μmol L <sup>-1</sup>                 |
| [ $NO_3^-$ ]                                    | 4.53       | μmol L <sup>-1</sup>                 |
| [ $DIC$ ]                                       | 3500       | μmol L <sup>-1</sup>                 |
| [ $\Sigma PO_4^{3-}$ ]                          | 0          | μmol L <sup>-1</sup>                 |
| Initial values of transient boundary conditions |            |                                      |
| Parameter                                       | Value      | Unit                                 |
| $J_{FeS_2}$                                     | 0          | mol m <sup>-2</sup> yr <sup>-1</sup> |
| $J_{Fe(OH)_3^\alpha}$                           | 0.0004254  | mol m <sup>-2</sup> yr <sup>-1</sup> |
| $J_{Fe(OH)_3^\beta}$                            | 0          | mol m <sup>-2</sup> yr <sup>-1</sup> |
| $J_{Fe(OH)_3^\gamma}$                           | 0.1155     | mol m <sup>-2</sup> yr <sup>-1</sup> |
| $J_{C_{org}^\alpha}$                            | 0.00000796 | mol m <sup>-2</sup> yr <sup>-1</sup> |
| $J_{C_{org}^\beta}$                             | 0.00000375 | mol m <sup>-2</sup> yr <sup>-1</sup> |
| $J_{C_{org}^\gamma}$                            | 0.1406     | mol m <sup>-2</sup> yr <sup>-1</sup> |
| [ $\Sigma H_2S$ ]                               | 0          | μmol L <sup>-1</sup>                 |
| [ $O_2$ ]                                       | 100        | μmol L <sup>-1</sup>                 |
| [ $Ca^{2+}$ ]                                   | 0.00294    | μmol L <sup>-1</sup>                 |
| [ $Cl^-$ ]                                      | 0.1561     | μmol L <sup>-1</sup>                 |
| [ $SO_4^{2-}$ ]                                 | 0.00806    | μmol L <sup>-1</sup>                 |

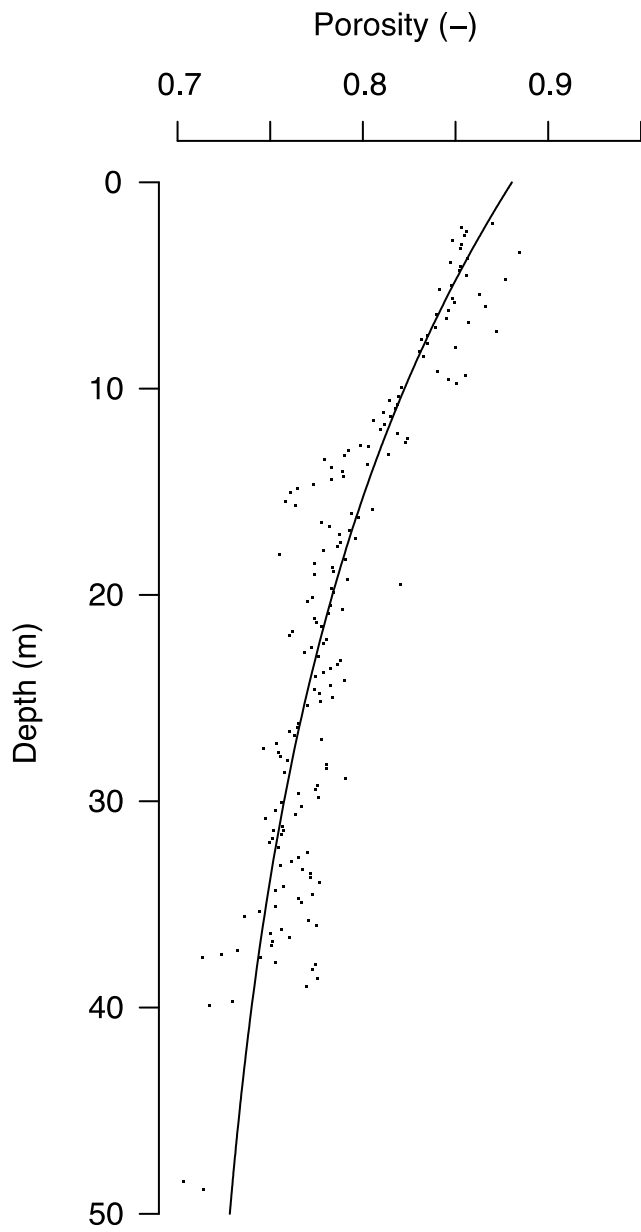

**Figure S1: Measured porosity data (dots) and fitted model profile (solid line) at site M0065. Corresponding fitting parameters are given in Table S3.**
