# Supplementary material for: Post-depositional vivianite formation alters sediment phosphorus records
Source: Copernicus journal article supplement (doi:10.5194/bg-2017-295), 2017-08-31
Supplement: Supplementary file [file bg-2017-295-AC1-supplement.pdf]

## Supplement

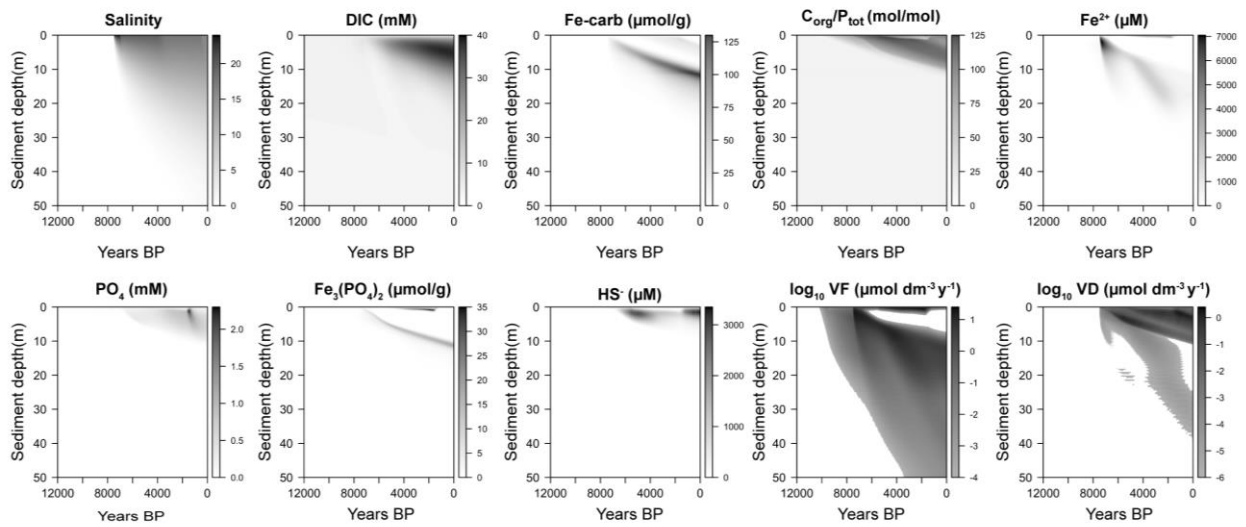

**Figure 11: Modeled evolution of salinity, dissolved inorganic carbon (DIC), Fe-carbonates (Fe-carb),  $C_{\text{org}}/P_{\text{tot}}$ , dissolved Fe ( $\text{Fe}^{2+}$ ), phosphate ( $\text{PO}_4$ ), vivianite ( $\text{Fe}_3(\text{PO}_4)_2$ ), dissolved sulfide ( $\text{HS}^-$ ) and rates of vivianite formation (VF) and vivianite dissolution (VD) in the Bornholm basin sediments from 12000 BP to present. A white color in the plots of VF and VD indicates values below the scale bar minimum. The increase in salinity at 7500 BP marks the onset of the lake-marine transition. The subsequent deposition of sediment in a brackish-marine environment and the related changes in the porewater chemistry led to major changes in solid phase chemistry as a function of sediment depth and time. The distinct bands of Fe-carbonate and vivianite ( $\text{Fe}_3(\text{PO}_4)_2$ ) minerals formed in the sediments are particularly striking.**
